# Supplementary material for: An Efficient Immunization Strategy for Community Networks
Source: PLoS One. 2013 Dec 20;8(12):e83489. doi: 10.1371/journal.pone.0083489 (PMC3869806; doi:10.1371/journal.pone.0083489)
Supplement: Text S1 — Computational Complexity Analysis. (PDF) [file pone.0083489.s006.pdf]

**Text. S1. Computational Complexity Analysis.** The BHD strategy falls into the general category of immunization algorithms based on the self-avoiding walks [1]. Starting with a self-avoiding walk at a randomly chosen node, we examine the overlap and the existence of links from  $f_t$  (i.e., all the neighbors of the last node after step  $t$ ) back to  $\mathcal{F}_{t-1}$  (i.e., the union of the friendship circles of all the visited nodes up to step  $t - 1$ ) in the trail of the walk, and this examination procedure is taken after every step once the walk has visited three or more sites.

For a randomly chosen node, it takes time  $O(1)$ . A self-avoiding walk takes the worst-case time  $O(N \ln N)$  [2], where  $N$  is network size. Following the above examination procedure, the connection relations between each node in  $f_t$  and all the nodes in  $\mathcal{F}_{t-1}$  are examined after each step of the walk, which takes the worst-case time  $O(\langle k \rangle N)$ , where  $\langle k \rangle$  is the average degree of the network. As  $N$  nodes may be visited at most by the walker, the whole process of this examination takes the worst-case time  $O(\langle k \rangle N^2)$ . When a walk stops, one bridge node and one bridge hub are identified. Thus, an identification process based on the self-avoiding walks takes the worst-case time  $O(1 + N \ln N + \langle k \rangle N^2) = O(\langle k \rangle N^2)$ . To achieve the desired immunization ratio  $f$ , the entire algorithm runs in time  $O(f \langle k \rangle N^3)$ . Analogously, the ACQ and CBF take the worst-case run times that go like  $O(fN)$  [3] and  $O(fN^3)$ , respectively.

1. Salathe M, Jones JH (2010) Dynamics and Control of Diseases in Networks with Community Structure. PLoS Comput Biol 6:1000736
2. Turban L (1983) Generalised self-avoiding walk. Physics A, 16: L643.
3. Chao G, Jiming L, Ning Z (2011) Network Immunization with Distributed Autonomy-Oriented Entities. IEEE Transactions on Parallel and Distributed Systems 22: 1222-1229.
